# Supplementary material for: Evolution of the Gut Microbiome in HIV-Exposed Uninfected and Unexposed Infants during the First Year of Life
Source: PubMed Central journal article supplement (PMC9600264; doi:10.1128/mbio.01229-22), 2022-09-08
Supplement: mbio.01229-22-s0001.pdf [file mbio.01229-22-s0001.pdf]

# Supplemental Figure 1: Longitudinal Alpha Diversity

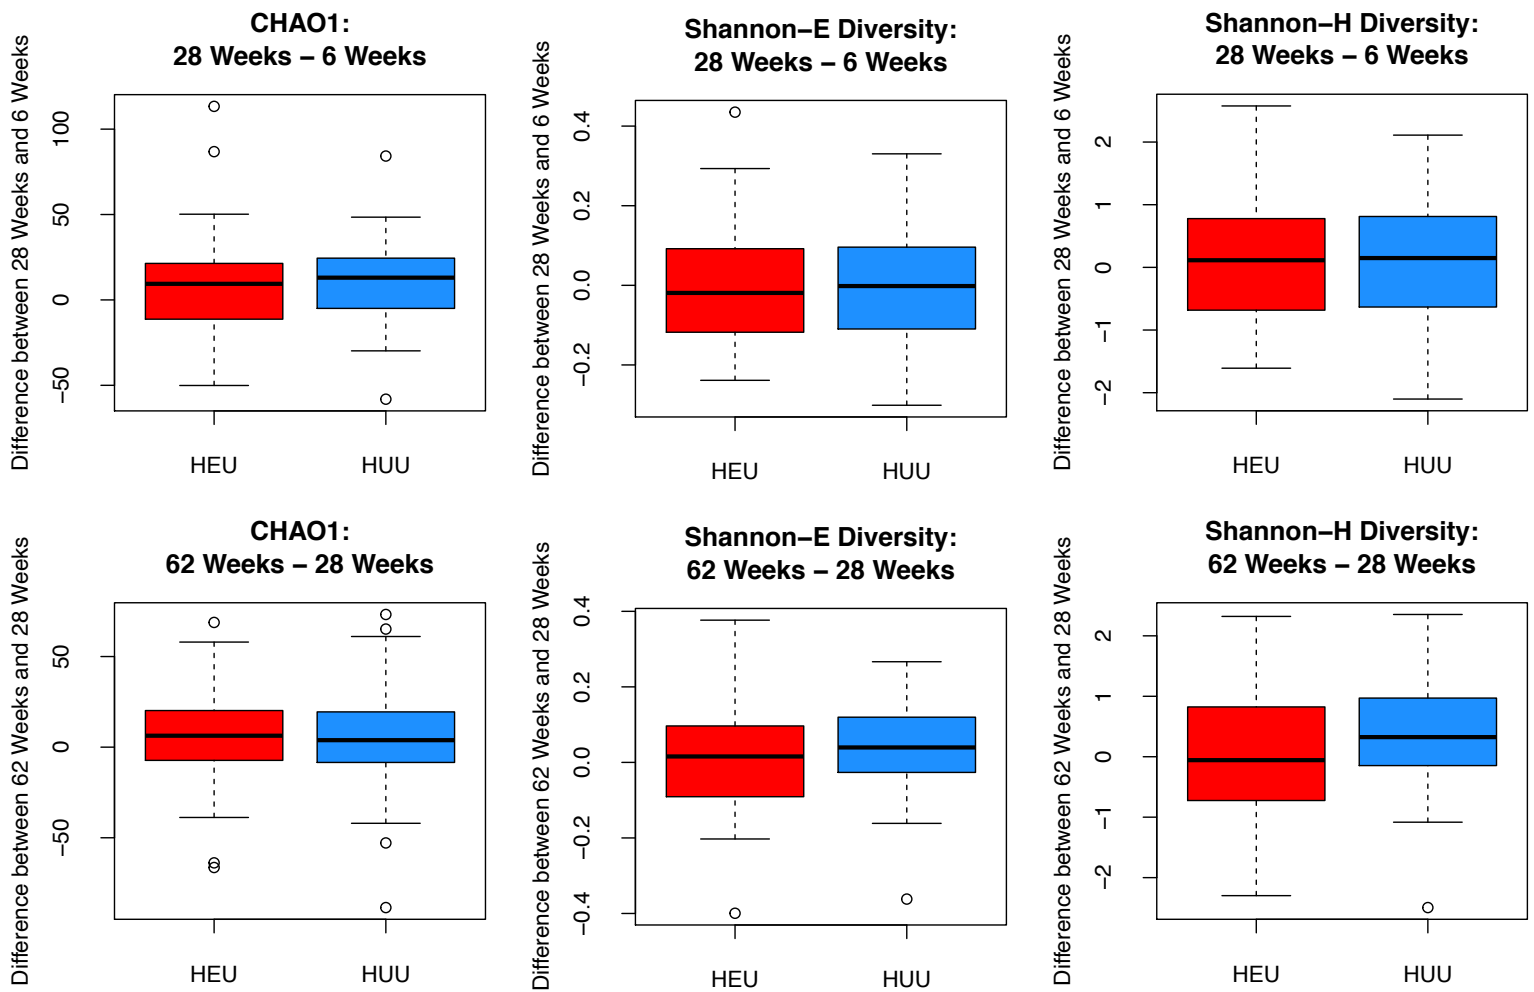

Longitudinal changes in alpha diversity measures between HEUs and HUUS.
