# Supplementary material for: Evolution of the Gut Microbiome in HIV-Exposed Uninfected and Unexposed Infants during the First Year of Life
Source: PubMed Central journal article supplement (PMC9600264; doi:10.1128/mbio.01229-22), 2022-09-08
Supplement: mbio.01229-22-s0002.pdf [file mbio.01229-22-s0002.pdf]

# OTU Relative Abundance

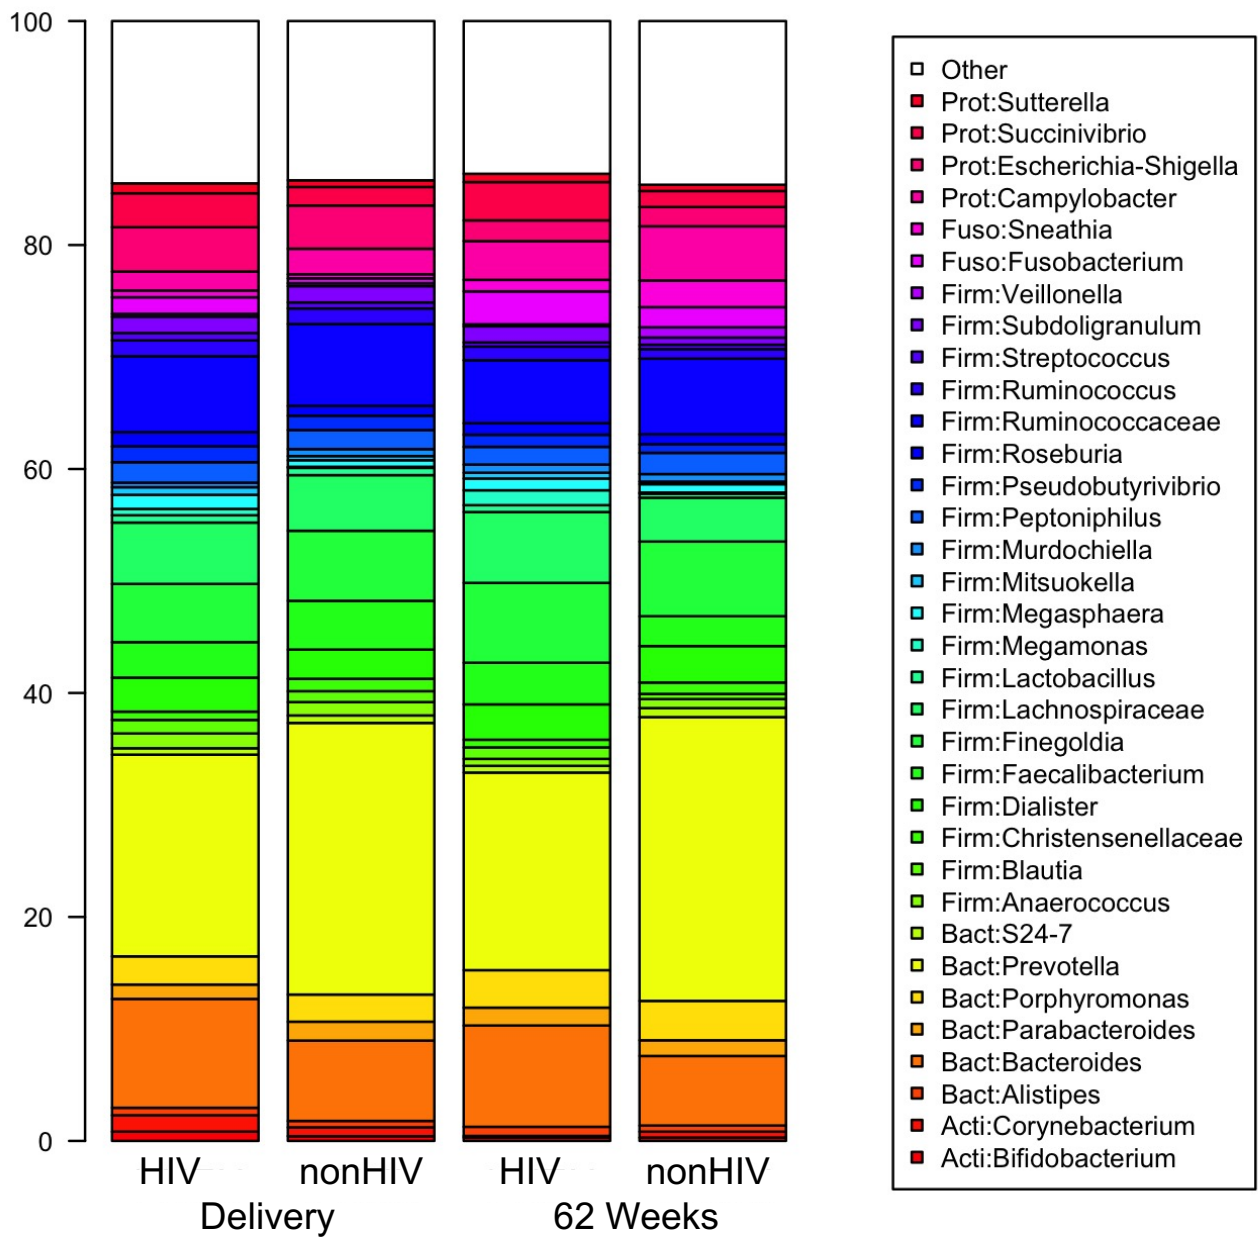

**Figure S2: Maternal Gut Microbiome Composition.** The Bray-Curtis analysis showed significant differences were observed at delivery (FDR=0.02) and at 62 weeks postpartum (FDR<0.01).
