# Supplementary material for: Evolution of the Gut Microbiome in HIV-Exposed Uninfected and Unexposed Infants during the First Year of Life
Source: PubMed Central journal article supplement (PMC9600264; doi:10.1128/mbio.01229-22), 2022-09-08
Supplement: mbio.01229-22-s0003.pdf [file mbio.01229-22-s0003.pdf]

Figure S3: Maternal microbiome – Beta diversity and HIV data

A

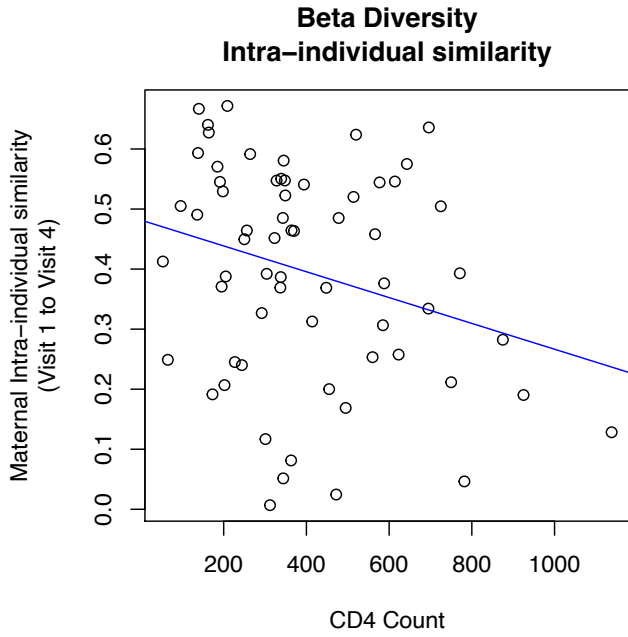

B

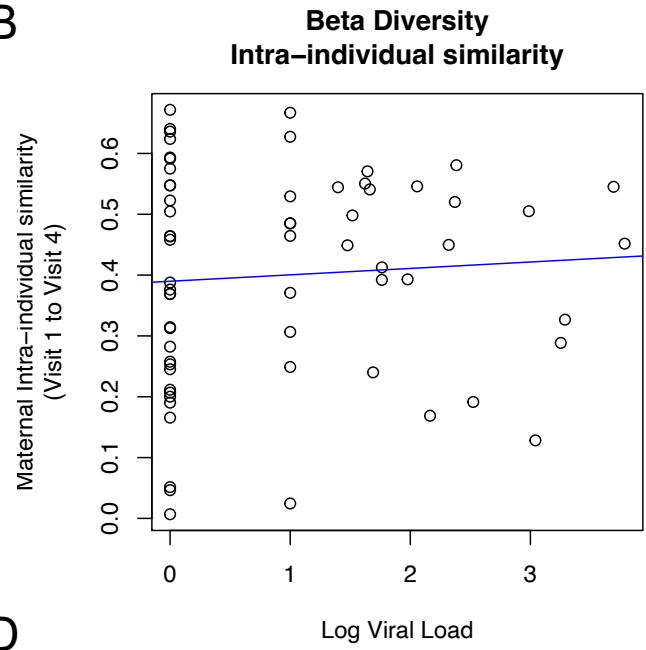

C

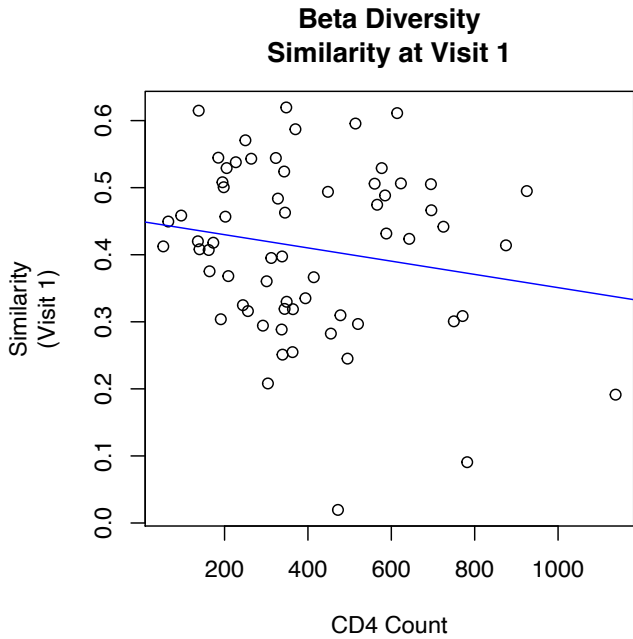

D

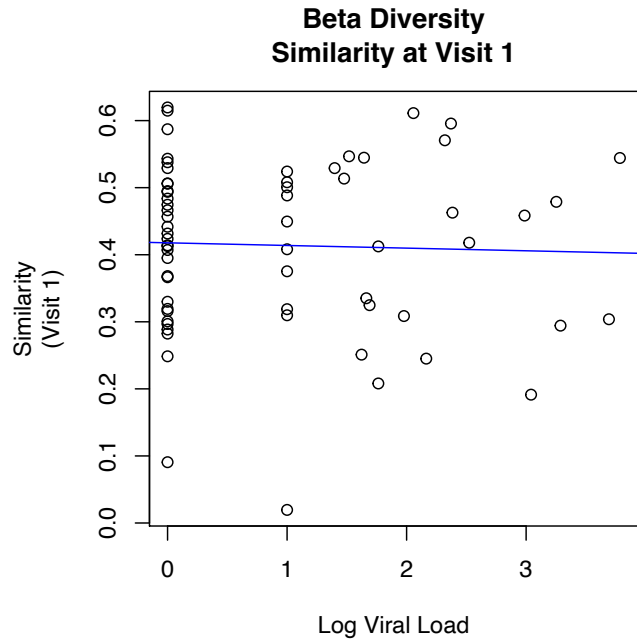

The relationship between paired intra-individual similarity between delivery and 62 weeks and CD4 count (S3A) and log viral load (S3B). The relationship between inter-individual similarity at delivery and CD4 count and log viral load (S3C – D) The relationship between paired intra-individual similarity between delivery and 62 weeks and CD4 count (S3A) and log viral load (S3B). The relationship between inter-individual similarity at delivery and CD4 count and log viral load (S3C – D)
